# Supplementary material for: A novel fluorescence probe for simultaneous detection of mitochondrial viscosity in hepatic ischemia reperfusion injury models
Source: Royal Society of Chemistry journal article supplement (doi:10.1039/d4ra00959b), 2024-01-01
Supplement: d4ra00959b1.pdf [file d4ra00959b1.pdf]

*Supporting Information for*

A Novel Fluorescence Probe for Simultaneous Detection of Mitochondrial Viscosity in Hepatic  
Ischemia Reperfusion Injury Models

Institute of Natural Medicine and Health Products, School of Pharmaceutical Sciences, Zhejiang Provincial Key

Laboratory of Plant Evolutionary Ecology and Conservation, Taizhou University, Zhejiang 318000, China

E-mail: [jfhu@tzc.edu.cn](mailto:jfhu@tzc.edu.cn)

## **Table of contents**

1. Further experimental details
2. Supporting figures and tables

## Experimental section

### Materials and apparatus

All chemicals were commercially available and used without further purification. <sup>1</sup>H NMR and <sup>13</sup>C NMR spectra were recorded using Bruker Avance 500 MHz spectrometers. The spectra were reported in ppm (δ) and referenced to a tetramethylsilane (TMS) standard in CDCl<sub>3</sub>, DMSO-d<sub>6</sub>. Thin layer chromatography (TLC) for reaction monitoring was performed on pre-coated silica gel plates (Merck 60 F254 nm) with a UV254 fluorescent indicator and column chromatography was conducted over silica gel (mesh 300–400). The fluorescence and UV-vis spectra were acquired on a SpectraMax M5 (Molecular Devices).

### Measurement of Viscosity

PN solutions (5 μM) of different viscosity were obtained by water-glycerol mixture in different volume ratios. The solution was continuously shaken for 1 hour and then allowed to stand for 30 minutes to eliminate bubbles. The mixed solution was measured fluorescence spectra with λ<sub>ex/em</sub> = 490/615 nm and both excitation and emission slit widths of 8 nm.

### Quantum yield calculation

The fluorescence quantum yield Φ<sub>s</sub> was estimated from the absorption and fluorescence spectra of probe according to equation, where the subscript s and r stand for the sample and reference (fluorescein as standard Φ<sub>F</sub> = 0.85), respectively. Φ is the quantum yields, a represents the absorbance at the excitation wavelength, S refers to the integrated emission band areas and n<sub>D</sub> is the solvent refractive index. The fluorescence quantum yields (Φ<sub>F</sub>) were estimated with equation as follows:

$$\varphi_s = \varphi_r \frac{S_s A_r n_{D_s}^2}{S_r A_s n_{D_r}^2}$$

### Cytotoxicity of probe PN

The cytotoxicity of probe PN was tested by MTT method. Miha cells were seeded at a density at 1 × 10<sup>4</sup> cells per well into 96-well plate, and incubated in 37 °C cell incubator

(containing 5% CO<sub>2</sub>) for 12 hours. The culture medium was high glucose DMEM with fetal bovine serum and appropriate antibiotics (penicillin and streptomycin). Then the probe **PN** (0, 1, 2, 5, 10, 20 μM) was added and incubated for 24 h. 50 μL MTT was added to each pore and the cells were incubated at 37 °C and 5% CO<sub>2</sub> for 4 h. Then, removed the medium and replaced it with DMSO (150μL), and detected the absorption values at 490 nm.

### **Cell culture and fluorescence imaging**

DMEM containing 10% fetal bovine serum and 1% penicillin was used for HepG2 cell culture in an incubator supplemented with 95% air and 5% CO<sub>2</sub> at 37 °C. Then cells were seeded into cell culture dishes at a density of  $2.0 \times 10^4$  in growth medium. For stimuli experiments, the cells were pretreated with nystatin for 30 min and then treated with 10 μM **PN** for 15 min. Then, nutrient solution was removed and cells were washed three times with PBS buffer (pH=7.0, 10 mM) before imaging. FL imaging was recorded by confocal luminescence microscope.

### **Viscosity monitoring in HIRI mouse model**

Before initiating experiments, mice underwent a 7-day acclimation period upon their arrival. Each study group comprised n = 3 mice. To construct HIRI mice model, an already established methodology was employed. All mice were intravenously injected with probe **PN** (100 μL, 0.1 mM in ultrapure water, with 2% DMSO, v/v), and then were fully anesthetized. After laparotomy, vascular clamps were used to block the blood flow to the left and median hepatic lobes, resulting in ~70% of the liver ischemia. After 90 min of ischemia, we removed the clamps, the blood supply to the mice's liver was restored for 1 hours. For normal group, the liver was exposed as a control. The abdominal cavity was then opened and the liver was removed for fluorescence imaging.

Table S1 previous viscosity probes and this work

| Probes                                                                              | $\lambda_{\text{ex}}/\text{nm}$ | $\lambda_{\text{em}}/\text{nm}$ | Stokes shift/nm | sensitivity |   |
|-------------------------------------------------------------------------------------|---------------------------------|---------------------------------|-----------------|-------------|---|
| 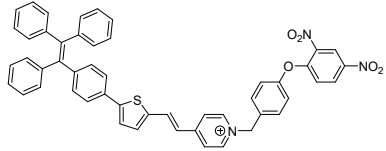   | 440                             | 620                             | 180             | 31 times    | 1 |
|    | 600                             | 710                             | 110             | 437 times   | 2 |
|    | 488                             | 671                             | 183             | Not mention | 3 |
|   | 734                             | 911                             | 177             | 10 times    | 4 |
|  | 550                             | 675                             | 125             | 125 times   | 5 |
|  | 500                             | 628                             | 128             | 20 times    | 6 |
|  | 640                             | 725                             | 85              | 140 times   | 7 |
|  | 570                             | 655                             | 85              | 48.5-fold   | 8 |

|                                                                                   |     |     |     |                   |    |
|-----------------------------------------------------------------------------------|-----|-----|-----|-------------------|----|
| 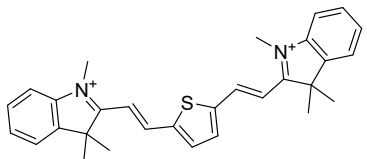 | 525 | 595 | 70  | Not mention       | 9  |
|  | 450 | 508 | 58  | less than 10-fold | 10 |
|  | 550 | 586 | 36  | Nearly 20-fold    | 11 |
| This work                                                                         | 600 | 790 | 190 | 32 times          |    |

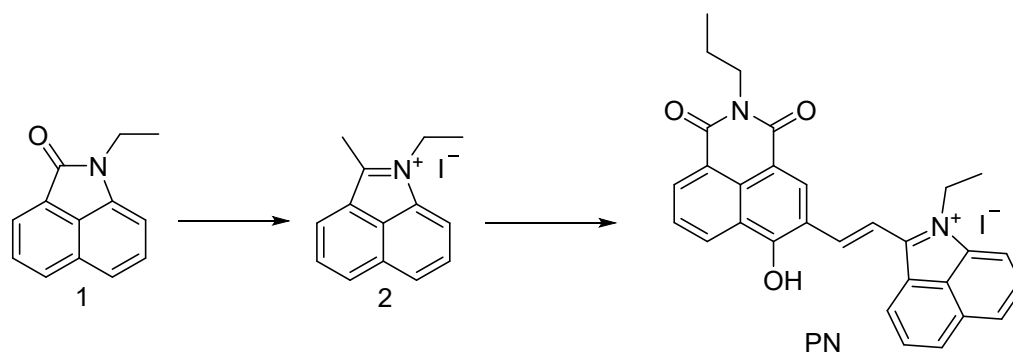

Scheme S1. Synthesis route of PN.

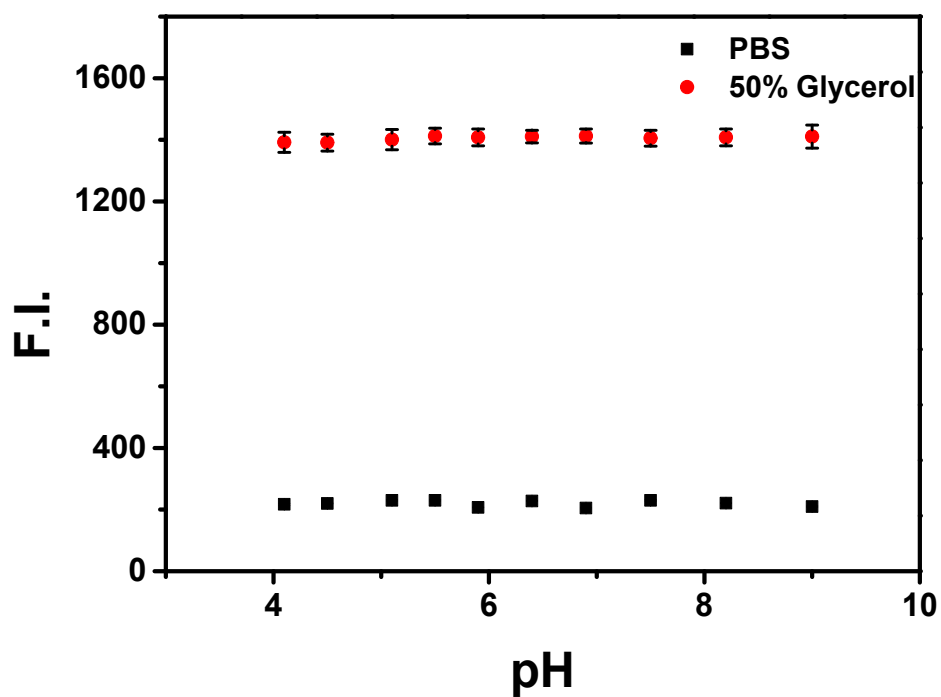

**Fig. S1** The effects of pH on the fluorescence intensity of 10  $\mu\text{M}$  PN in presence of varied glycerol volumetric ratios.

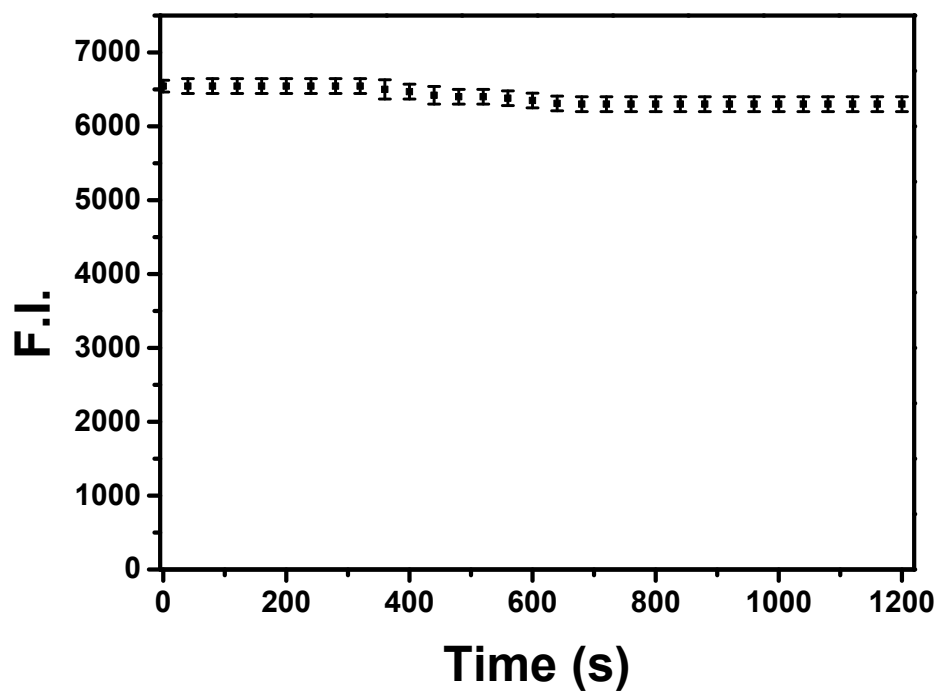

**Fig. S2** Photobleaching of PN (10  $\mu\text{M}$ ) in 95% glycerol solution under irradiation with 660 nm laser (300  $\text{mW}/\text{cm}^2$ ).

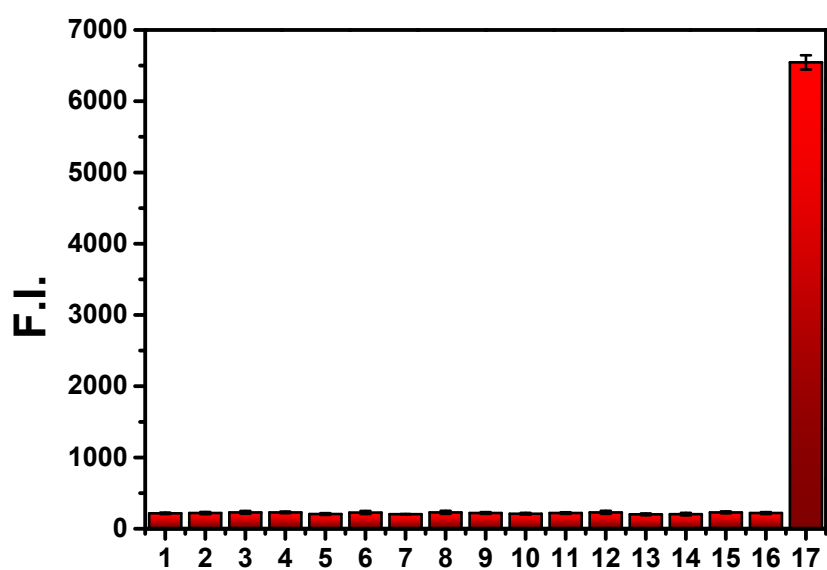

**Fig. S3** Fluorescence intensity of 10 μM PN toward various species (100 μM) in PBS/glycerol (v:v = 1:1) mixture (down), respectively. (1) Blank; (2)Ser; (3)Cys; (4)GSH; (5)Hcy; (6)BSA; (7)SO<sub>3</sub><sup>2-</sup>; (8)ClO<sup>-</sup>; (9)ClO<sub>4</sub><sup>-</sup>; (10)H<sub>2</sub>O<sub>2</sub>; (11)CO<sub>3</sub><sup>2-</sup>; (12)OAc<sup>-</sup>; (13)NO<sub>3</sub><sup>-</sup>; (14)Cl<sup>-</sup>; (15)Fe<sup>3+</sup>; (16)Zn<sup>2+</sup>; (17) Glycerol.



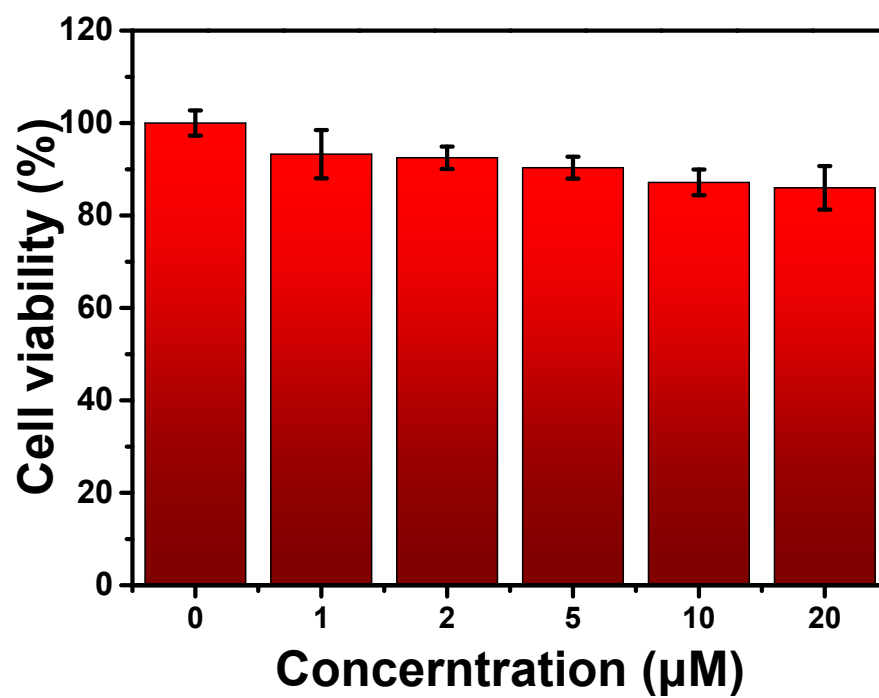

**Fig. S4** MTT results of HepG2 cells viabilities after incubation with PN for 24 h. Data are expressed as mean  $\pm$  SD (\* $p < 0.05$ , experiment times  $n = 3$ ).

- [1] Liu, W.; Wang, T.; Wang, L.; Wang, Y.; Hu, S.; Tian, D., *Spectrochim. Acta. A Mol. Biomol. Spectrosc.*, 2024, **304**, 123329.
- [2] Liu, Y.; Feng, S.; Gong, S.; Feng, G., *Anal. Chem.*, 2022, **94**, 17439-17447.
- [3] Liu, W.; Wang, Y.; Wang, T.; Wang, L.; Hu, S.; Tian, D., *Anal. Chim. Acta.*, 2023, **1253**, 341099.
- [4] Ge, J.; Cai, W.; Niu, N.; Wen, Y.; Wu, Q.; Wang, L.; Wang, D.; Tang, B. Z.; Zhang, R., *Biomaterials*, 2023, **300**, 122190.
- [5] Hao, X.; Zhan, J.; Geng, C.; Lin, W., *Spectrochim. Acta. A Mol. Biomol. Spectrosc.*, 2022, **284**, 121807.
- [6] Xu, S.-L.; Guo, F.-F.; Xu, Z.-H.; Wang, Y.; James, T. D., *Sensors Actuat. B Chem.*, 2023, **383**, 133510.
- [7] Wang, H.; Zheng, H.; Zhang, W.; Yang, L.; Yu, M.; Li, Z., *Sensors Actuat. B Chem.*, 2023, **394**, 134347.
- [8] Guo, R.; Yin, J.; Ma, Y.; Wang, Q.; Lin, W., *J. Mater. Chem. B*, 2018, **6**, 2894-2900.
- [9] Baek, Y.; Park, S. J.; Zhou, X.; Kim, G.; Kim, H. M.; Yoon, J., *Biosens. Bioelectron.*, 2016, **86**, 885-891.
- [10] Dai, X.; Dong, B.; Ren, M.; Lin, W., *J. Mater. Chem. B*, 2018, **6**, 381-385.
- [11] Li, L.-L.; Li, K.; Li, M.-Y.; Shi, L.; Liu, Y.-H.; Zhang, H.; Pan, S.-L.; Wang, N.; Zhou, Q.; Yu, X.-Q., *Anal. Chem.*, 2018, **90**, 5873-5878.

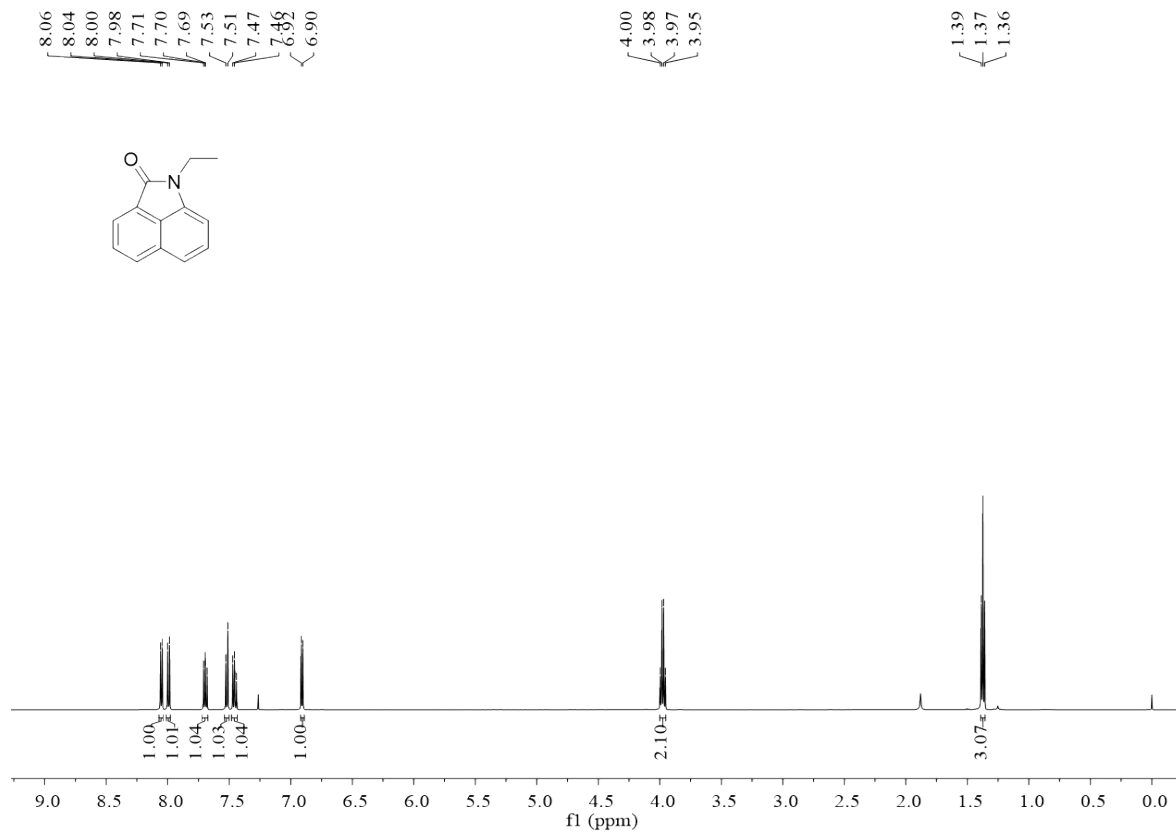

Fig. S5 <sup>1</sup>H NMR spectrum of compound 1 in CHCl<sub>3</sub>-d<sub>6</sub>.

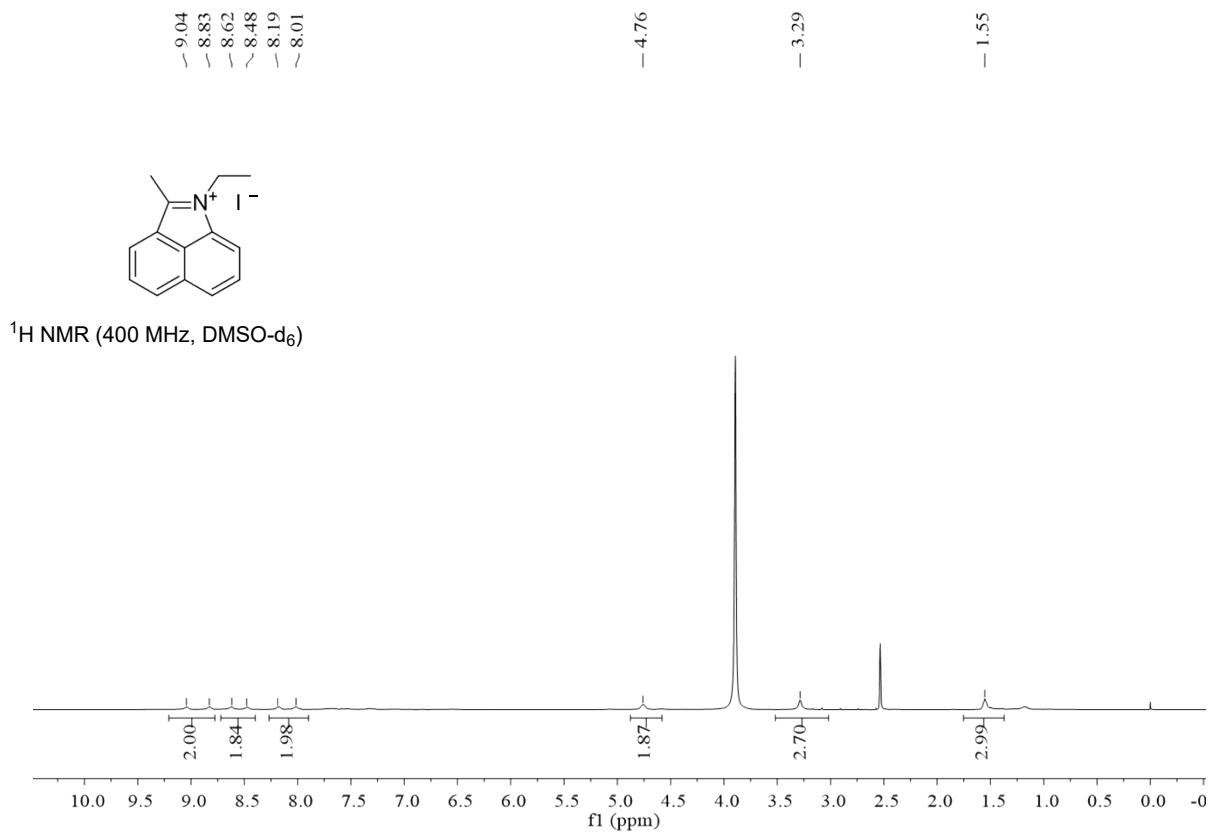

Fig. S6 <sup>1</sup>H NMR spectrum of compound 2 in DMSO-d<sub>6</sub>.

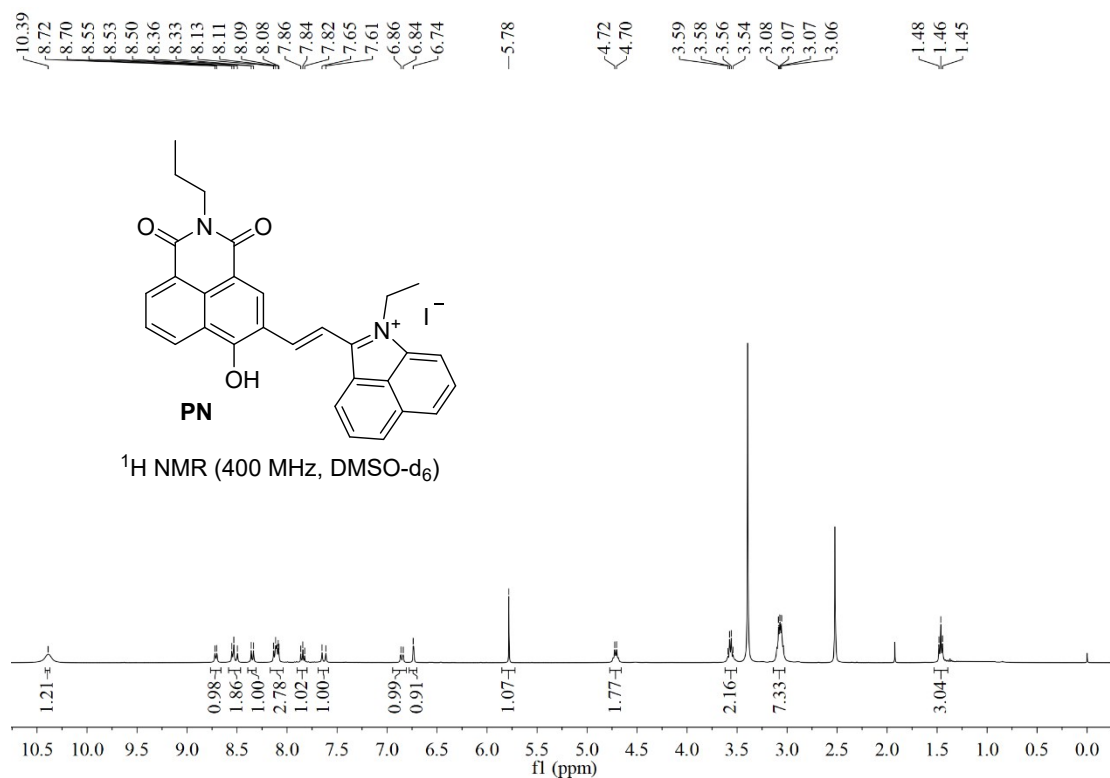

**Fig. S7**  $^1\text{H}$  NMR spectrum of PN in  $\text{DMSO-}d_6$ .

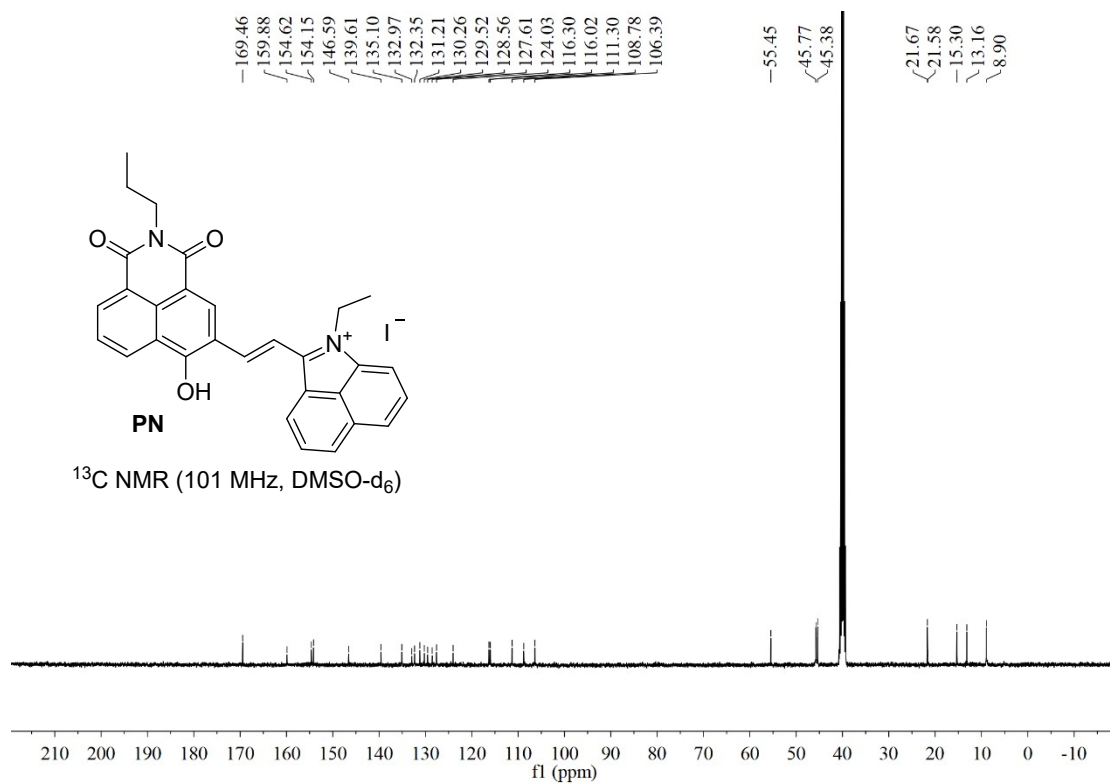

**Fig. S8**  $^{13}\text{C}$  NMR spectrum of PN in  $\text{DMSO-}d_6$ .

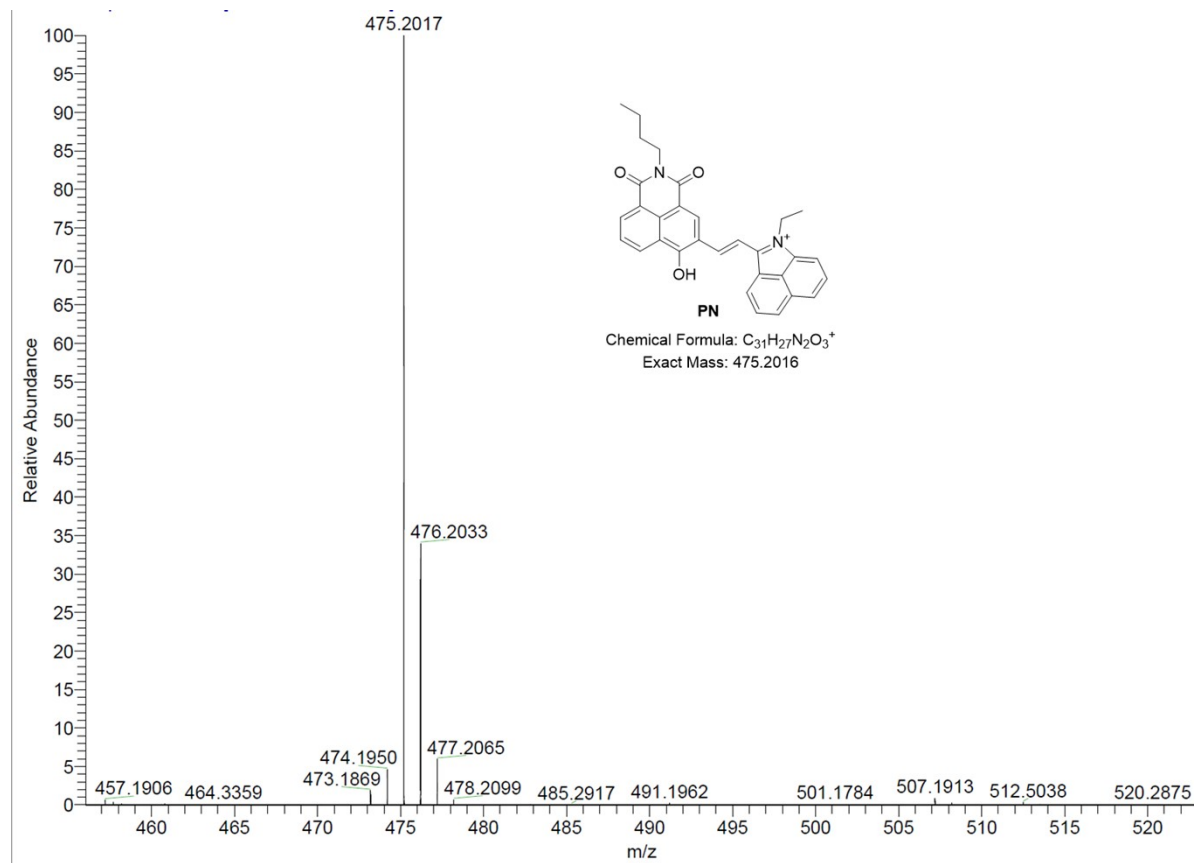

**Fig. S9** HRMS result of compound **PN'** cation part.
